# PREDICTED INFECTION RISK VIA AEROSOLS

Martin Kriegel<sup>1</sup>, Udo Buchholz<sup>2</sup>, Petra Gastmeier<sup>3</sup>, Peter Bischoff<sup>3</sup>, Inas Abdelgawad<sup>4</sup>, Anne Hartmann<sup>1</sup>

<sup>1</sup> Technical University of Berlin, Hermann-Rietschel-Institut

<sup>2</sup> Robert-Koch-Institute, Department for Infectious Disease Epidemiology

<sup>3</sup> Charité-University Medicine Berlin, Institute for Hygiene and Environmental Medicine

<sup>4</sup> Public Health Department Berlin Spandau

## Address for correspondence:

Prof. Dr.-Ing. Martin Kriegel

Hermann-Rietschel-Institut

TU Berlin

[m.kriegel@tu-berlin.de](mailto:m.kriegel@tu-berlin.de)

## Author contributions:

MK extended the existing models and performed the calculation. UB and IA supplied the data for retrospective analysis to validate the model. PG, PB, UB and IA evaluated the results from a medical point of view. AH performed the literature research and the review of the models and calculations. MK and AH drafted the manuscript. All authors contributed to the interpretation of the results, critically revised the paper and agreed on the final version for submission.

## 1 **Abstract**

2 Currently, airborne transmission is seen as the most important transmission path for SARS-  
3 CoV-2. In this investigation, models of other researchers with the aim to predict an infection  
4 risk for exposed persons in a room through aerosols emitted by an infectious case-patient  
5 were extended. As a novelty – usually neglected – parameters or boundary conditions, namely  
6 the non-stationarity of aerosol and the half life of aerosolized virus, were included and a new  
7 method for determining the quanta emission rate based on measurements of the particle  
8 emission rate and respiratory rate at different types of activities was implemented.

9 As a second step, the model was applied to twelve outbreaks to compare the predicted  
10 infection risk with the observed attack rate. To estimate a “credible interval” of the predicted  
11 infection risk the quanta emission rate, the respiratory rate as well as the air volume flow were  
12 varied.

13 In nine out of twelve outbreaks, the calculated predicted infection risk via aerosols was found  
14 to be in the range the attack rate (with the variation of the boundary conditions) and reasons  
15 for the observed larger divergence were discussed.

16 The validation was considered successful and therefore, the use of the model could be  
17 recommended to predict the risk of an infection via aerosols in given situations. Furthermore,  
18 appropriate preventive measures can be designed.

19

20

21 **Keywords:** Aerosols, Infection Risk, SARS-CoV-2, retrospective analysis, calculation model,  
22 preventive measures

23

24

25

26

## 27 **Introduction**

28 The respiratory route is the main mode of transmission for the virus causing COVID-19  
29 (SARS-CoV-2) [1, 2, 3]. The virus is transported on particles that can enter the respiratory  
30 tract. Whereas larger particles (droplets) are only able to stay in the air for a short time and  
31 just in the near field (approx. 1.5 m), because they settle down quickly, smaller particles  
32 (called aerosols) are also concentrated in the near field and in addition can follow the air flow  
33 and cause infections in the far field. Epidemiologically, short-range transmission (through  
34 aerosols or droplets) is distinguished from long-range transmission (aerosol).  
35 In order to perform an infection risk assessment for the airborne transmission in the far field  
36 and to introduce appropriate preventive measures, it would be necessary to know the amount  
37 of aerosols produced by an infected person during various activities, how many viruses stick  
38 to the aerosols and how many viruses are necessary to cause an infection. However, this  
39 information is usually available very late during the course of a pandemic, if it can be  
40 determined at all. Another well-known approach is to use retrospective analysis of infection  
41 outbreaks that are very probably due to far field transmission to determine a virus-laden  
42 aerosol concentration. Exposed people have inhaled the virus-laden aerosols according to  
43 their respiratory volume flow. The approach presented here corresponds to a combination of  
44 known measured source rates of respiratory aerosols at different activities and the  
45 retrospective analysis of previous infection incidents with the aim to calculate a predicted  
46 infection risk via aerosols and to calculate the necessary air volume flow to reduce the risk of  
47 COVID-19 infections.

48

## 49 **State of the Art**

50 The so-called aerosols (liquid or solid particles in a dispersed phase with a fluid) as well as  
51 droplets differ by size. The particles, which are transported in a fluid over a longer distance,  
52 are called aerosols. Droplets are stronger influenced by gravitation and are depositing more

53 rapidly. Depending on the fluid velocity the size of particles, which can be transported in air  
54 for a longer distance, is different. In internal spaces with typical air velocities of up to 0.2 m/s  
55 particles smaller than 10  $\mu\text{m}$  will be distributed by air very well, with a higher air velocity  
56 larger particles may be transported in air as well.

57 SARS-CoV-2 was found to be transmitted via close contact as well as over distance in  
58 internal spaces, whereby in distant transmission so-called super-spreading events are more  
59 probable [1, 2, 4].

60 In 1978, Riley et al. [5] evaluated a measles outbreak in a suburban elementary school. Based  
61 on the number of susceptible persons (S), which have been infected (D) during each stage of  
62 infection, the risk (P) for an infection in this stage has been calculated regarding equation (1).  
63 Therefore, the risk for an infection has been defined as the percentage of infected persons  
64 from the number of pupils not already infected or vaccinated.

$$P = \frac{D}{S} \quad (1)$$

65 A Poisson-distribution of the risk of infection has been assumed as well as a stationary and  
66 evenly distributed concentration of the pathogens in the room air. Equation (2) shows the  
67 Poisson-distribution.

$$P = 1 - e^{-\lambda} \quad (2)$$

68 Therefore, Wells defined in 1955 [6] a size called quantum as the number of emitted  
69 infectious units, where the probability to get infected is  $1 - e^{-1} = 63.2\%$ . Hence, a quantum  
70 can be seen as a combination of the amount of emitted aerosols with the virus transported on  
71 them and a critical dose, which may result in an infection in 63.2 % of the exposed persons.  
72 Using the quantum concept as well as equation (2) has been combined by Riley [5] to  
73 equation (3).

$$P = 1 - e^{-I \cdot q \cdot Q_b \cdot t / Q} \quad (3)$$

74 In equation (3), the number of infectious persons (I), the quanta emission rate depending on  
75 the activity (q), the pulmonary ventilation rate of exposed susceptible persons ( $Q_b$ ), the  
76 duration of stay (t) and the volume flow of pathogen free air (Q) was used. The quotient  $q/Q$   
77 represents the quanta concentration.

78 In poorly ventilated rooms, the assumption of a stationary concentration of quanta is not  
79 justified, because of the long time, which is necessary until the stationary concentration is  
80 reached. The normalized time-dependent concentration process can be calculated according to  
81 equation (4) and is shown in Figure 1. How rapidly the concentration of a human emitted  
82 contamination in a room raises depends on the air exchange rate (ACH) and the time (t). This  
83 relative concentration ( $c_{rel}$ ) can be seen as an increase in the concentration compared to the  
84 volume flow.

$$c_{rel} = 1 - e^{-ACH \cdot t} \quad (4)$$

85

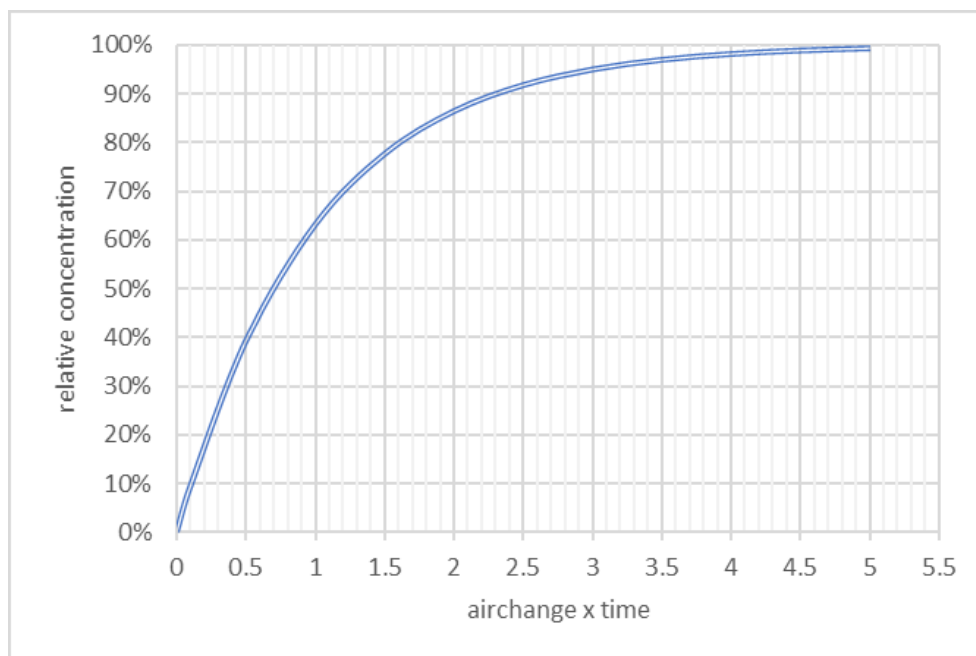

86

87 *Figure 1: Relative concentration curve as a function of air exchange rate and time.*

88

89 In all published studies identified ideal mixing ventilation was assumed, which means that  
90 aerosols are evenly distributed in the room air. To avoid this assumption Noakes and Sleigh  
91 [7] divided the room air into different zones, which are themselves considered to be well  
92 mixed and have a uniform concentration. This should make it possible to calculate local  
93 differences in concentration and thus locally differing infection risks. Furthermore, other  
94 studies, which focus on the unsteady conditions mostly use the boundary condition of a  
95 starting concentration of  $c(t = 0) = 0 \frac{quanta}{m^3}$ . Gammaitoni and Nucci [8] implemented the  
96 starting condition of  $c(t = 0) = c_0$  as well as the number of exposed susceptible people,  
97 which may also change over time depending on their immune status.

98  
99 To estimate the risk of infection in a given setting by a given infectious person with the  
100 Wells-Riley-equation either the quanta emission rate or the P have to be known. In the  
101 beginning of an epidemic, both values are unknown. Dai and Zhao [9] correlated and  
102 calculated q for SARS-CoV-2 based on the basic reproduction number ( $R_0$ ) known from  
103 former outbreaks of MERS, tuberculosis, Influenza as well as SARS-CoV-1 and published  
104 the equation (5). If  $R_0$  is known, q can be estimated as proposed by Dai and Zhao [9]. For  
105 SARS-CoV-2 the average basic reproduction number has been estimated to be 3.28 [10], 3.32  
106 [11] and 3.77 [12].

$$q = -30.27958 - 44.81536 \cdot R_0 + 19.67934 \cdot R_0^2 \quad (5)$$

107  
108 In various studies of infection occurrences associated with SARS-CoV-2, q was determined  
109 using the Wells-Riley equation. Different authors [9, 13] found a range of 22 to 61 quanta/h  
110 with an assumed low activity (breathing, speaking) and values of 341 to 1190 quanta/h when  
111 singing.

112

113 The virus can be transported on particles in air and the emission of aerosols can be used as an  
114 indicator for the emission of virus, but a correlation between  $q$  and the aerosol emission rate  
115 (E) has not been investigated so far. In measurements at the Hermann-Rietschel-Institute  
116 (HRI) of Technical University of Berlin [14, 15] the particle emission rates during breathing,  
117 speaking, coughing as well as singing was measured. During breathing through the nose about  
118 25 particles/s was emitted and during coughing about 13,700 particles/cough, whereas it can  
119 be seen that depending on the activity a wide range of particle emission rates can be found.  
120 The transmission of a pathogen via aerosols is also influenced by the stability of the virus in  
121 the environment. In an experimental study van Doremalen et al [16] measured the decrease of  
122 infectious virus in air and on different surfaces and compared SARS-CoV-1 and SARS-CoV-  
123 2. Under the given conditions, the half-life of SARS-CoV-2 as well as SARS-CoV-1 was  
124 about 1.1 h.  
125 The longer aerosols stay in the room air the proportion of inactivated virus is increasing. The  
126 age of air is depending on the airflow as well as the position of the source of pollutants. At  
127 each point in the room, a local age of air can be calculated. The age of air ( $\tau_n$ ) can be used as a  
128 measure to evaluate the air quality. For an ideal mixing ventilation, the mean age of air is  
129 equal to the nominal time constant, which can be calculated using equation (6) as the quotient  
130 of the room volume ( $V$ ) and the air volume flow ( $Q$ ).

$$\tau_n = \frac{V}{Q} \quad (6)$$

131 Besides the number of emitted pathogen-laden aerosols, the number of inhaled pathogens is  
132 playing an important role as well with regard to the assessment of the risk of infection. The  
133 pulmonary ventilation rate may differ with different activities. Gupta et al. [17] performed a  
134 study with 25 healthy adults and found a sine wave for mere breathing, but a more constant  
135 volume flow during talking.

136 In measurements with athletes as well as sedentary persons a maximum volume flow for the  
137 athletes of 200 l/min (12 m<sup>3</sup>/h) was found by Córdova and Latasa [18].

138 To measure the airflow without movement restrictions, a helmet was used by Jiang et al. [19]  
139 in 32 subjects (16 males, 16 females) during speaking with different volumes as well as  
140 during singing.

141 A comparison between a machine-learning based model and measurements of respiratory rate  
142 was performed by Dumond et al. [20].

143 As a conclusion, the following average values can be used for adults:

- 144 • low activity (breathing while lying): 0.45 m<sup>3</sup>/h [19]
- 145 • low activity (breathing while sitting, standing or talking): 0.54 m<sup>3</sup>/h [19, 20]
- 146 • singing: 0.65 m<sup>3</sup>/h [21]
- 147 • mid activity (physical work): 0.9 m<sup>3</sup>/h [20]
- 148 • sports: 1.2 m<sup>3</sup>/h [18, 20]

149 For children, the lung volume is smaller. Therefore, the respiratory rate for children aged 14  
150 can be assumed to be 0.45 m<sup>3</sup>/h for low activity (breathing while sitting, standing, talking)  
151 [22].

152

## 153 **Methods**

### 154 **Extension of the Wells-Riley equation for calculating the Predicted Infection Risk via** 155 **Aerosols (PIRA)**

156 The Wells-Riley equation can be summarized as equation (7). To calculate the predicted  
157 infection risk via aerosols (PIRA) in the far field of a room the concentration of quanta ( $c(t)$ )  
158 and the respiratory rate ( $Q_b$ ) has to be known. The integration of  $c(t)$  can be understood as the  
159 amount of particles inhaled per m<sup>3</sup>/h. With  $Q_b$  the number of inhaled quanta can therefore be  
160 calculated.



$$PIRA = 1 - e^{-\int [c(t)] \cdot Q_b} \quad (7)$$

161 Equation (5) can be used for the definition of the quantum emission. This leads to a quanta  
162 emission rate of  $q = 40$  1/h at an assumed mean  $R_0 = 3.35$ . The mathematical approximation  
163 presented by Dai und Zhao [9] can be optimized by equation (8), see Figure 2. For Figure 2  
164 the quanta emission rate has been correlated with  $R_0$  of tuberculosis [23, 24], Influenza [23,  
165 25], MERS [26, 27] and SARS-CoV [23, 28].

166 Equation (8) results in  $q = 139$  1/h for an assumed mean  $R_0 = 3.35$ . Because of the high  
167 variance of the  $q$  as well as  $R_0$  given in the currently available literature the difference  
168 between the  $q$  calculated regarding equation (5) and equation (8) seems reasonable.

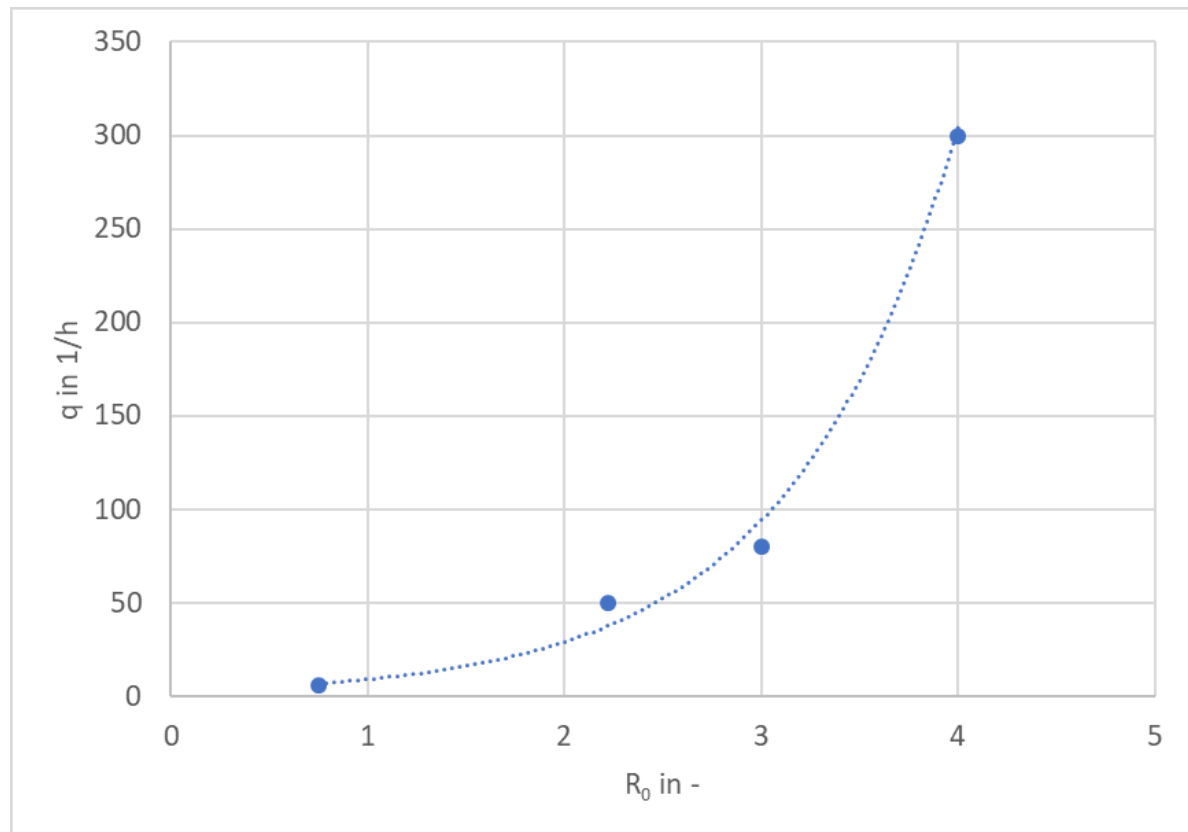

169 *Figure 2: Relationship between quanta emission rate and  $R_0$  according Dai and Zhao [9]*

170

$$q_0 = 2.7618 \cdot (e^{1.1761 \cdot R_0} - 1) \quad (8)$$

171

172  $q$  is influenced by the activity of the person as was shown by Buonanno et al. [29]. Therefore,  
173 the measured aerosol emission rates  $E$  [14, 15] were correlated with the calculated quanta  
174 emission rates influenced by the activity  $q_a$  by equation (9). For low-activity (breathing,  
175 talking, sitting, standing) a basic volume flow  $Q_{b,0}$  and normal activity = low activity  
176 (breathing, talking, sitting, standing) with a basic emission rate of  $E_0$  was used. Furthermore,  
177 the basic  $q$  ( $q_0$ ) was calculated with usage of  $R_0$  regarding equation (8). With these  
178 specifications  $q_a$  can be calculated.

$$q_a = q_0 \cdot \frac{E}{E_0} \cdot \frac{Q_b}{Q_{b,0}} \quad (9)$$

$$Q_{b,0} = 0.54 \frac{m^3}{h}; \quad E_0 = 100 \frac{P}{s} [15]$$

179  
180 The effect of e.g. mouth-nose protection can be considered by using their filtration efficiency  
181 ( $F_{MNS}$ ) like in equation (10) which however will not be further considered in the following.

$$q_{a,MNS} = F_{MNS} \cdot q_a \quad (10)$$

182  
183 It is known that the infectivity of an infected person depends on the disease progression over  
184 time [30]. This is shown qualitatively in Figure 3. With a simplified mathematical approach,  
185 this can be integrated into the quanta source rate. An equation could be implemented to take  
186 this into account.

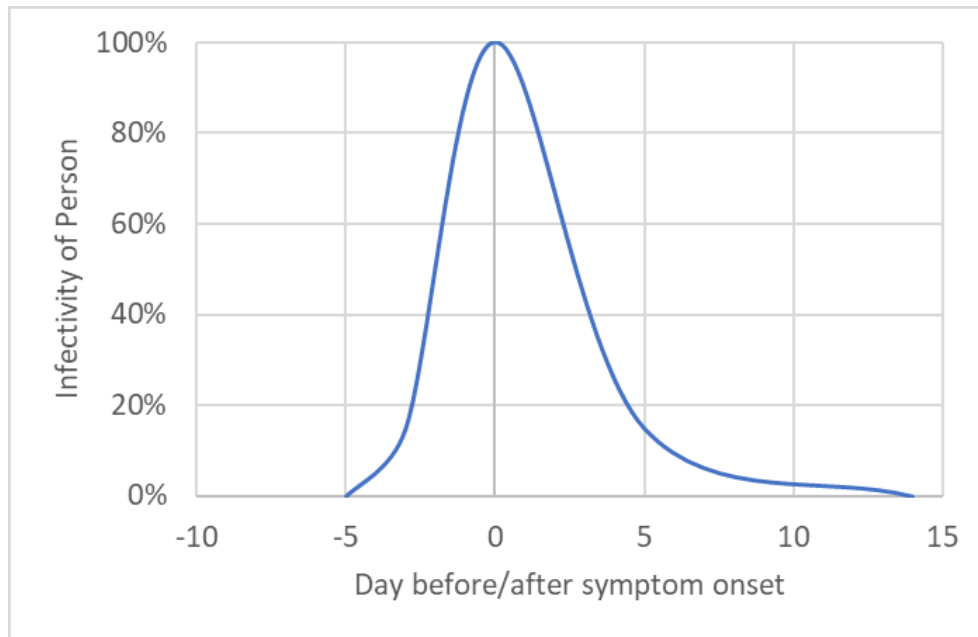

187

188 *Figure 3: Infectivity depending on the disease progression*

189

190 Under experimental conditions, the half-life of virus was measured as 1.1 h [16]. Thus, the  
191 number of emitted infectious quanta at time  $t$  ( $q_a(t)$ ) is calculated according to equation (11).

$$q_a(t) = q_a \cdot e^{(-0.5776 \cdot t)} = q_a \cdot e^{\left(-\frac{361}{625}t\right)} \quad (11)$$

192 The concentration of quanta during the increase  $c_I(t)$  can be calculated according to equation  
193 (12) with the number of infectious persons ( $n$ ).

$$c_I(t) = \frac{q_a(t)}{Q} \cdot n \cdot (1 - e^{(-ACH \cdot t)}) \quad (12)$$

194 An additional case is considered that if the time  $t$  is longer than the age of the air  $\tau_n$ , most of  
195 the virus-laden aerosols have left the room with the exhaust, before the inactivation can take  
196 place. Therefore, this concentration during the steady state situation is called  $c_\tau(t)$ .

$$q_{a,\tau} = q_a \cdot e^{(-0.5776 \cdot \tau_n)} \quad (13)$$

$$c_\tau(t) = \frac{q_{a,\tau}}{Q} \cdot n \cdot (1 - e^{(-ACH \cdot t)}) \quad (14)$$

197 with  $\tau_n$  regarding equation (6)

198

199 For calculating the risk of infection the unsteady concentrations  $c_I$  and  $c_\tau$  has to be used, to  
 200 include the time-dependent increase in concentration and to include the time-dependent  
 201 viability of the virus, otherwise the result could be overestimated or underestimated.  
 202 For equation (7) the integration of  $c_I(t)$  and  $c_\tau(t)$  is necessary.

$$C_I = \int_0^t c_I(t) dt = \frac{q_a \cdot \left( 390625 \cdot ACH - ((390625 \cdot ACH + 225625) \cdot e^{ACH \cdot t} - 225625) \cdot e^{-ACH \cdot t - \frac{361}{625}t} \right)}{Q \cdot (225625 \cdot ACH + 130321)} \quad (15)$$

$$C_\tau = \int_\tau^{t \geq \tau_n} c_\tau(t) dt = \frac{q_{a,\tau} \cdot e^{-ACH \cdot (t + \tau_n)} \cdot (ACH \cdot (t - \tau_n) \cdot e^{ACH \cdot (t + \tau_n)} - e^{ACH \cdot t} + e^{ACH \cdot \tau_n})}{Q \cdot ACH} \quad (16)$$

203  
 204 The Predicted Infection Risk via Aerosols can be calculated by equation (17) and (18).

$$PIRA = 1 - e^{-(C_I(t=\tau) + C_\tau) \cdot Q_b} \quad t > \tau_n \quad (17)$$

$$PIRA = 1 - e^{-(C_I) \cdot Q_b} \quad t \leq \tau_n \quad (18)$$

205  
 206 For the calculation of PIRA the following assumptions must be considered:

- 207 • the aerosols are ideally mixed in the room
- 208 • the near field (up to approx. 1.5 m distance from the emitting person) can contain a  
 209 much higher virus-laden aerosol concentration
- 210 • the air, which is introduced into the room, is free of virus-laden aerosols (e.g. outside  
 211 air)
- 212 • no deposition of small particles is considered, because the settling time is longer than  
 213 the stability of the virus and the deposition rate would therefore be substantially  
 214 smaller than the inactivation
- 215 • the concentration of aerosols at the beginning is 0

## 216 **Results**

217 The PIRA calculation model was validated by using parameters of several known outbreaks  
218 during the SARS-CoV-2 pandemic. Twelve different scenarios either scientifically published  
219 or registered by the local health authorities were selected (A-L). The boundary conditions for  
220 the calculations of these situations can be found in Table 1.

221 *Table 1: Boundary conditions of SARS-CoV-2 outbreaks for the retrospective calculation of PIRA*

|                                     | A    | B    | C    | D      | E    | F    | G        | H        | I        | J    | K    | L       |
|-------------------------------------|------|------|------|--------|------|------|----------|----------|----------|------|------|---------|
| V in m <sup>3</sup>                 | 3000 | 1200 | 60*  | 630    | 254  | 830  | 180      | 150      | 150      | 47   | 170  | 60***   |
| n                                   | 1    | 1    | 1    | 1      | 1    | 1    | 1        | 1        | 1        | 1    | 1    | 1       |
| q <sub>a</sub> in 1/h               | 232  | 4213 | 139  | 139    | 139  | 4213 | 116      | 116      | 139      | 139  | 139  | 139     |
| Q <sub>b</sub> in m <sup>3</sup> /h | 0.9  | 0.65 | 0.54 | 0.54   | 0.54 | 0.65 | 0.45     | 0.45     | 0.54     | 0.54 | 0.54 | 0,54    |
| Q in m <sup>3</sup> /h              | 1600 | 200* | 200* | 4000** | 50*  | 200* | 1500*    | 1500*    | 400*     | 75   | 200* | 1260*** |
| exposure time t in h                | 8    | 2.5  | 1.66 | 8      | 1.5  | 2.5  | 4.5***** | 1.5***** | 4.5***** | 1.2  | 2    | 11      |
| Attack Rate****<br>in %             | 26%  | 91%  | 34%  | 5%     | 58%  | 87%  | 10%      | 6%       | 43%      | 45%  | 17%  | 63%     |

\*due to partly missing information, assumptions were made, especially for window ventilation. The assumptions are based on information from the persons involved on how the windows were opened and closed in combination with weather data at the time.

\*\* It was assumed that the local regulations for fresh air supply were fulfilled.

\*\*\*Geometry and Ventilation Rate due to [31]

\*\*\*\*Attack Rate was simplified as percentage of persons infected. No separation regarding infection attack rate (measured serologically) and illness attack rate (persons with symptoms or laboratory-confirmed) was performed.

\*\*\*\*\* It was assumed that a school lesson lasts 45 minutes.

|   | Setting                        | Country | Remarks                                                                                                                                                                                                                                                                                                                                                                                                                   |
|---|--------------------------------|---------|---------------------------------------------------------------------------------------------------------------------------------------------------------------------------------------------------------------------------------------------------------------------------------------------------------------------------------------------------------------------------------------------------------------------------|
| A | Slaughterhouse [32]            | Germany |                                                                                                                                                                                                                                                                                                                                                                                                                           |
| B | Choir rehearsal Berlin         | Germany | not yet scientifically published, investigated by Robert-Koch-Institute                                                                                                                                                                                                                                                                                                                                                   |
| C | Bus Tour [33]                  | China   |                                                                                                                                                                                                                                                                                                                                                                                                                           |
| D | Call Center [34]               | Korea   | The attack rate is mentioned as 43 % in the publication. However, the infection occurred almost exclusively on one half of the 11th floor. The local attack rate is therefore actually significantly higher. In Table 1 an attack rate of 5% was given, because only persons who had shown symptoms were quarantined. If one includes the persons who showed symptoms up to and including 04.02., the attack rate is 5 %. |
| E | Club Meeting                   | Germany | not yet scientifically published, investigated by Robert-Koch-Institute                                                                                                                                                                                                                                                                                                                                                   |
| F | Choir rehearsal Skagiq<br>[13] | USA     |                                                                                                                                                                                                                                                                                                                                                                                                                           |
| G | School Berlin 1                | Germany | not yet scientifically published, investigated by Public Health Department Berlin Spandau                                                                                                                                                                                                                                                                                                                                 |
| H | School Berlin 2                | Germany | not yet scientifically published, investigated by Public Health Department Berlin Spandau                                                                                                                                                                                                                                                                                                                                 |
| I | School Israel [35]             | Israel  |                                                                                                                                                                                                                                                                                                                                                                                                                           |
| J | Restaurant [1, 36]             | China   |                                                                                                                                                                                                                                                                                                                                                                                                                           |
| K | Meeting                        | Germany | not yet scientifically published, investigated by Robert-Koch-Institute                                                                                                                                                                                                                                                                                                                                                   |
| L | Aircraft [37]                  | -       |                                                                                                                                                                                                                                                                                                                                                                                                                           |

223 The infection events used for the validation of the model are shown in Table 1 with the  
224 necessary parameters for the calculation. In the following, the comparison between the  
225 documented Attack Rate (AR) and the PIRA is drawn.  
226 The  $q$  used here was calculated according to equation (9) with the assumption that the cases  
227 emitted particles as measured in [14, 15]. Due to the high spread of the particle emission  $E$   
228 and the unknown proportions of breathing, speaking, singing and shouting as well as the  
229 respiratory volume flows, simplified a-priori assumptions were made. To take into account  
230 the effects of the uncertainties regarding  $q$ ,  $Q_b$  and especially with window ventilation on  $Q$ ,  
231 these values were further varied -  $q$  by +/- 20%,  $Q_b$  by +/- 20% and  $Q$  by +/- 50%,  
232 individually and in combination, which then lead to a minimum PIRA and maximum PIRA.  
233 Figure 4 presents PIRA and the minima and maxima calculated with the different variants.  
234 The red dots show the documented AR.

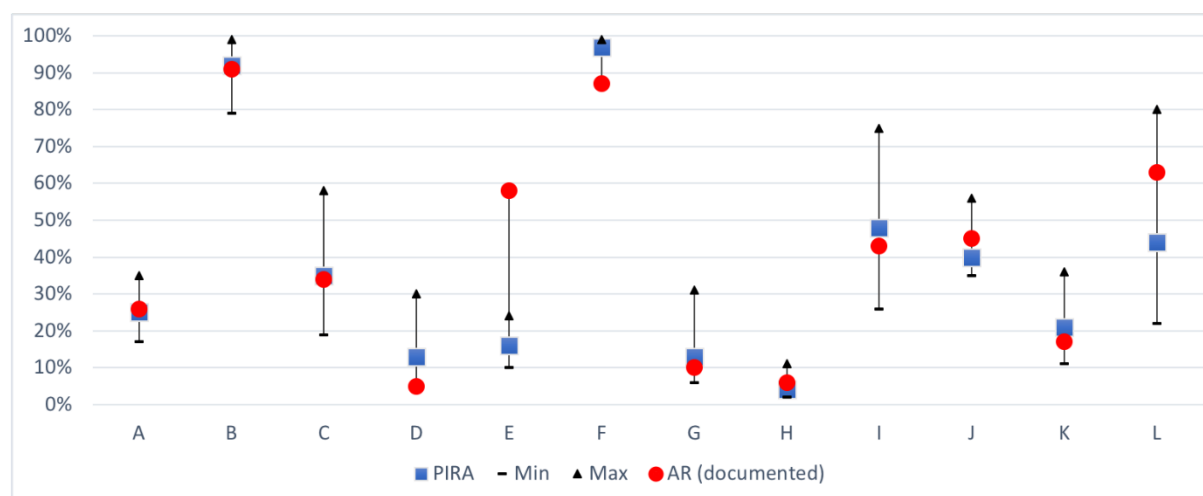

235  
236 *Figure 4: Comparison between PIRA with the variants Min and Max to the documented AR*  
237 *assuming that all cases were caused by long-range transmission*  
238  
239 In nine out of twelve outbreaks, the attack rate lies in the Min Max values of the calculated  
240 PIRA (see Table 2).



241 *Table 2: Results of the Calculation of PIRA and comparison with the documented AR*

|                 | A   | B   | C   | D   | E   | F   | G   | H   | I   | J   | K   | L   |
|-----------------|-----|-----|-----|-----|-----|-----|-----|-----|-----|-----|-----|-----|
| PIRA            | 25% | 92% | 35% | 13% | 16% | 97% | 13% | 4%  | 48% | 40% | 21% | 44% |
| Min             | 17% | 79% | 19% | 6%  | 10% | 88% | 6%  | 2%  | 26% | 35% | 11% | 22% |
| Max             | 35% | 99% | 58% | 30% | 24% | 99% | 31% | 11% | 75% | 56% | 36% | 80% |
| AR (documented) | 26% | 91% | 34% | 5%  | 58% | 87% | 10% | 6%  | 43% | 45% | 17% | 63% |

242

243 From the PIRA model, it can be calculated how much volume flow per hour of exposure time  
244 is required to not exceed a certain PIRA. The results are shown in Figure 5. It can be seen that  
245 for a PIRA of 10% a volume flow of clean air of 750 m<sup>3</sup>/h and hour of exposure has to be  
246 supplied to the room (see Table 3), whereas for two hours 1500 m<sup>3</sup>/h will be necessary for the  
247 same PIRA.

248 As a regression of the calculated results presented in Figure 5 equation (19) was derived.

249 Using equation (19) the required volume flow per hour of exposure time can be calculated.

250 This information refers to the steady state if the product of ACH and t is higher than 5.0, see

251 Figure 1. If the product is smaller, correspondingly lower volume flows lead to the respective

252 PIRA.

$$Q_{sp} = 75 \cdot \frac{1}{PIRA} \quad (19)$$

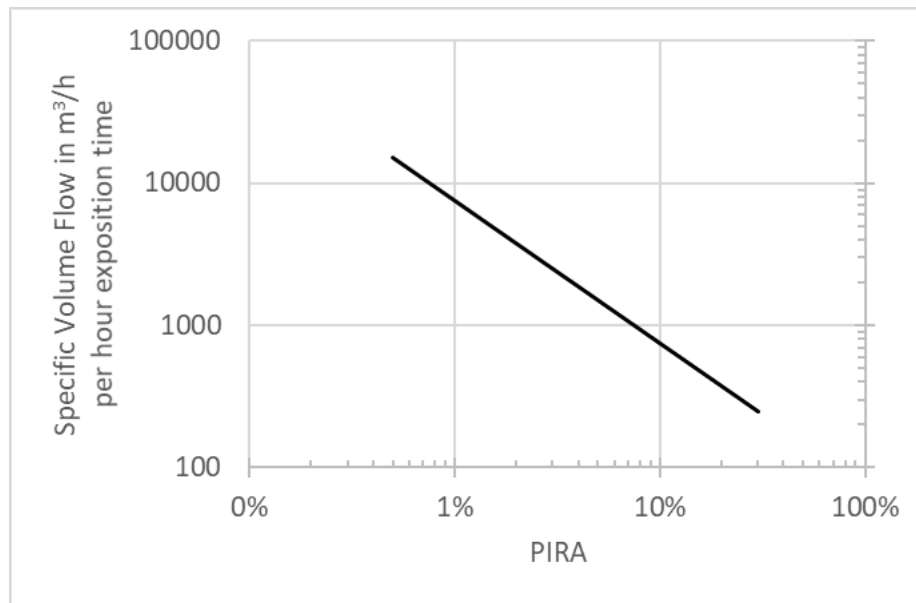

253

254 *Figure 5: Required specific volume flow per hour exposure time with regard to meeting a*  
 255 *specific PIRA*

256

257 Table 3 lists practical examples of the required volume flows depending on the exposure time  
 258 and PIRA.

259 *Table 3: Required volume flow at a certain exposure time for a defined PIRA*

|                       |   | PIRA                    |                        |                        |
|-----------------------|---|-------------------------|------------------------|------------------------|
|                       |   | 1%                      | 5%                     | 10%                    |
| exposure<br>time in h | 1 | 7500 m <sup>3</sup> /h  | 1500 m <sup>3</sup> /h | 750 m <sup>3</sup> /h  |
|                       | 2 | 15000 m <sup>3</sup> /h | 3000 m <sup>3</sup> /h | 1500 m <sup>3</sup> /h |
|                       | 3 | 22500 m <sup>3</sup> /h | 4500 m <sup>3</sup> /h | 2250 m <sup>3</sup> /h |

260 Another type of evaluation shows the possible number of infected persons in relation to the  
 261 person-related volume flow and the number of persons in a room (see Figure 6), if several  
 262 exposed persons are in a room and each person would have 6 m<sup>3</sup> of room volume available. If  
 263 more volume flow is available to each person, the result changes marginally and tends  
 264 towards a lower PIRA. For an exposure time of two hours a volume flow of 20 m<sup>3</sup>/(h·Per)

265 resulted in five probably infected persons in a room with 20, 40 or 100 persons, but of course  
 266 only one probably infected person in a room with two persons. For a volume flow of  
 267  $60 \text{ m}^3/(\text{h}\cdot\text{Per})$  the number decreases to two probably infected persons in a room with 20, 40 or  
 268 100 persons, but of course stayed at one probably person for just two persons in a room.

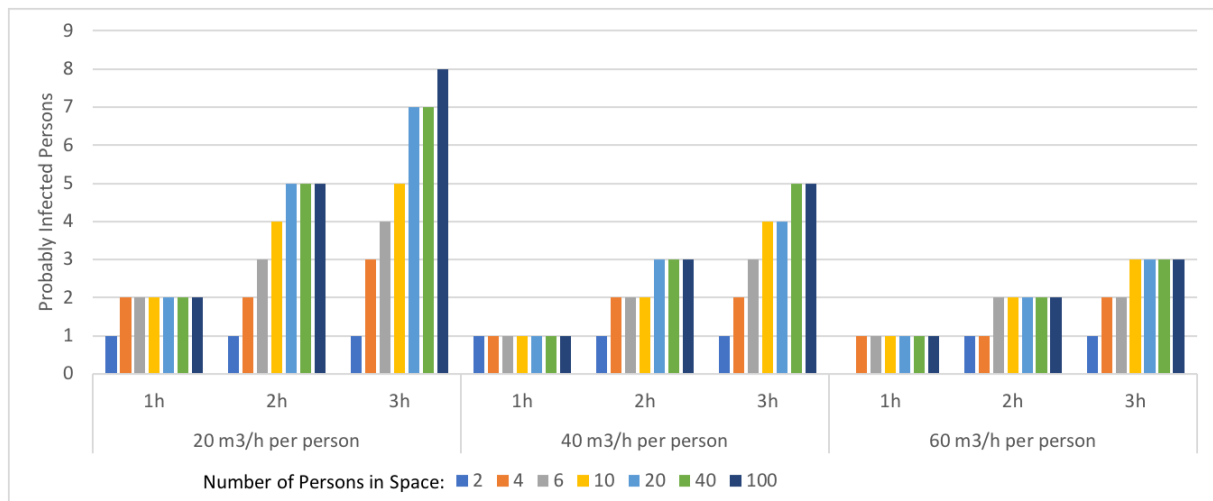

269

270 *Figure 6: Number of persons probably infected according to a specific volume flow*

271

## 272 Discussion

273 For the first time with a  $q$  based on  $R_0$  the PIRA was calculated for different known SARS-  
 274 CoV-2 outbreaks. In addition, the necessary air volume flows to reduce the risk of infection  
 275 were calculated.

276 In Table 4 the  $q$ -values are compared according to the stationary equation (3) and the PIRA  
 277 model under the boundary conditions of Table 1. Large differences between the same  
 278 activities were observed in the calculation of steady-state.

279 First of all, in comparison, with fixed  $q$  according to equation (9) very good agreement can be  
 280 achieved with the documented AR in the retrospectively considered cases A, B, C, H, I, J, K.

281

282 *Table 4: comparison steady state and unsteady calculated quanta*

|                | q in 1/h |      |     |     |     |      |     |      |     |     |     |     |
|----------------|----------|------|-----|-----|-----|------|-----|------|-----|-----|-----|-----|
|                | A        | B    | C   | D   | E   | F    | G   | H    | I   | J   | K   | L   |
| q steady state | 255      | 344  | 275 | 965 | 67  | 449  | 808 | 2545 | 223 | 144 | 411 | 330 |
| q unsteady     | 232      | 4213 | 139 | 139 | 139 | 4213 | 116 | 116  | 139 | 139 | 139 | 139 |

283

284 In outbreak D, the documentation does not clearly show how large the actual AR was for the

285 area under consideration. Due to the fact, that only the person who showed symptoms was

286 isolated, it is possible that in the meantime, additional persons, who were already infected by

287 the index case may have infected others (e.g. presymptomatically) leading to the high AR.

288 In outbreak E, there is only little documentation of the infection process, and further contact

289 between some of the persons has occurred in a restaurant afterwards. Furthermore, it has not

290 been determined whether the infection can be attributed to only one person. The high AR after

291 a short time of exposure allows the conclusion that either two index persons were present or

292 that the exposure time was prolonged by the meeting in a restaurant.

293 In outbreak F, the group was not together for the entire time and some of the subjects

294 continued rehearsing in another room. For this reason, the exposure time for the whole group

295 was lower and therefore this may account for the lower AR than calculated by PIRA is given.

296 In outbreak L an air exchange rate of 21 1/h was assumed. A relatively small change in the

297 assumed volume flow has a significant influence on the result of PIRA (where the total

298 exposure time was used). Furthermore, it cannot be excluded that droplet transmission may

299 also have happened.

300 Secondly, many assumptions were made, therefore it is not clear if the formula is already

301 optimal, perhaps further optimization during the course of the pandemic is possible if further

302 knowledge is available.

303 Third, the calculation model does not consider the sedimentation behavior of particles. It is  
304 known that at higher air velocities and especially at high turbulence the sedimentation  
305 behavior increases. In typical indoor air flows this decrease is about 10 % per hour. Compared  
306 to the uncertainty of the overall emission rate, this effect is not significant.

307 Fourth, the calculation model assumes a homogeneous distribution of the particles in the room  
308 air. Practically however the ventilation effectiveness is locally very different. The differences  
309 can be slightly greater than 100%.

310 Finally, it must be noted that the aerosol concentration is significantly higher in the near field  
311 of the emitting person and the results of PIRA are not valid within the generally accepted  
312 1.5 m distance rules.

313

## 314 **Conclusion**

315 It was shown in this investigation that it was possible to calculate the risk of an infection via  
316 aerosols for situations where the long-distance transmission is more important. By using the  
317 model presented here, a good agreement to previous infection outbreaks in different settings  
318 and different attack rates was achieved. Previous retrospectively determined quanta emission  
319 rates usually assumed a stationary state. However, if the concentration process is important  
320 for the total amount of inhaled virus-laden aerosols (usually at  $ACH \times t < 5$ ), then a stationary  
321 observation leads to an incorrect boundary condition. The time-dependent viability of the  
322 virus also plays a significant role. Here, the influence of the viability is higher at low air  
323 change rates compared with high ones, because the virus stays in the room air for a longer  
324 time period and the proportion of inactivated pathogens increase. However, the effect of time-  
325 dependent viability is not that important that a low air change rate has an overall positive  
326 effect.

327 To reduce the risk of infection via aerosols the necessary volume flow of virus-free air  
328 depending on the exposure time can be seen in Figure 5. This figure may be helpful to

329 implement measures, like increasing the virus-free air supply rate. Furthermore, the number of  
330 exposed persons has to be kept in mind. An infection risk of 60% may result in one infected  
331 person in a two-person office, but in 60 infected persons in a room with 100 persons.  
332 Predicting the infection risk via aerosols and knowing the important parameters can help in the  
333 selection of appropriate preventive actions.

334

### 335 **Declarations**

336 The authors received no specific funding for this work.

337 The authors declare no competing interests.

338 The authors declare that they followed the appropriate research guidelines.

## Literature

- [1] Y. Li, H. Qian, J. Hang, X. Chen, L. Hong, P. Liang, J. Li, S. Xiao, J. Wie, L. Liu und M. Kang, „Evidence for probable aerosol transmission of SARS-CoV-2 in a poorly ventilated restaurant,“ *Preprint medRxiv*, 2020.
- [2] G. Correia, L. Rodrigues, M. Gameiro da Silva und T. Gonçalves, „Airborne route and bad use of ventilation systems as non-negligible factors in SARS-CoV-2 transmission,“ *Medical Hypotheses*, Bd. 141, 2020.
- [3] L. Ferretti, C. Wymant, M. Kendall, L. Zhao, A. Nurtay, L. Abeler-Dörner, M. Parker, D. Bonsall und C. Fraser, „Quantifying SARS-CoV-2 transmission suggests epidemic control with digital contact tracing,“ *Science*, Bd. eabb6936, p. 368, 2020.
- [4] L. Morawska und J. Cao, „Airborne transmission of SARS-CoV-2: The world should face the reality,“ *Environment International*, Bd. 139, 2020.
- [5] E. Riley, G. Murphy und R. Riley, „Airborne Spread of Measles in a Suburban Elementary School,“ *American Journal of Epidemiology*, Bd. 107, Nr. 5, pp. 421-432, 1978.
- [6] W. Wells, Airborne contagion and air hygiene: an ecological study of droplet infections, 1955.
- [7] C. Noakes und A. Sleight, „Applying the Wells-Riley equation to the risk of airborne infection in hospital environments: The importance of stochastic and proximity effects,“ in *Indoor Air*, Copenhagen, Denmark, 2008.
- [8] L. Gammaitoni und M. Nucci, „Using a Mathematical Model to Evaluate the Efficacy of TB Control Measures,“ *Emerging Infectious Diseases*, Bd. 3, Nr. 3, pp. 335-342, 1997.
- [9] H. Dai und B. Zhao, „Association of the infection probability of COVID-19 with ventilation rates in confined spaces,“ *Building Simulations*, 2020.
- [10] Y. Liu, G. AA., A. Wilder-Smith und J. Rocklöv, „The reproductive number of COVID-19 is hisher compared to SARS coronavirus,“ *Journal of Travel Medicine*, pp. 1-4, 2020.
- [11] Y. Alimohamadi, M. Taghdir und M. Sepandi, „The Estimate of the Basic Reproduction Number of Novel Coronavirus disease (COVID-19): A Systematic Review and Meta-Analysis,“ *Journal of Preventive Medicine and Public Health*, Bd. March, 2020.
- [12] Y.-F. Lin, Q. Duan, Y. Zhou, T. Yuan, P. Li, T. Fitzpatrick, F. Leiwen, A. Feng, G. Luo, Y. Zhan, B. Liang, S. Fan, Y. Lu, B. Wang, Z. Wang, H. Zhao, Y. Gao, M. Li, D. Chen, X. Chen, Y. Ao, L. Li, W. D. X. Cai, Y. Shu und H. Zhou, „Spread and Impact of COVID-19 in China: A Systematic Review and Synthesis of Predictions From Transmission-Dynamic Models,“ *frontiers in Medicine*, 2020.
- [13] S. Miller, W. Nazaroff, J. Jimenez, A. Boerstra, G. Buonanno, S. Dancer, J. Kurnitski, L. Marr, L. Morawska und C. Noakes, „Transmission of SARS-CoV-2 by inhalation of respiratory aerosol in the Skagit Valley Chorale superspreading event,“ *Preprint medRxiv*, 2020.
- [14] D. Mürbe, M. Kriegel, J. Lange, H. Rotheudt und M. Fleischer, „Aerosol emission is increased in professional singing,“ *Preprint*, 2020.
- [15] A. Hartmann, J. Lange, H. Rotheudt und M. Kriegel, „Emission rate and particle size of bioaerosols during breathing, speaking and coughing,“ *Preprint*, 2020.
- [16] N. van Doremalen, T. Bushmaker, D. Morris, M. Holbrook, A. Gamble, B. Williamson, A. Tamin, J. T. N. Harcourt, S. Gerber, J. Lloyd-Smith, E. de Wit und V. Munster, „Aerosol and Surface Stability of SARS-CoV-2 as Compared with SARS-CoV-1,“ *New England Journal of Medicine*, Bde. %1 von %2April, 16, p. 382, 2020.

- [17] J. Gupta, C.-H. Lin und Q. Chen, „Characterizing exhaled airflow from breathing and talking,“ *Indoor Air*, Bd. 20, pp. 31-39, 2010.
- [18] A. Córdova und I. Latasa, „Respiratory flows as a method for safely preventing the coronavirus transmission (COVID-19),“ *Apunts Sports Medicine*, Bd. 55, pp. 81-85, 2020.
- [19] J. Jiang, R. Hanna, M. Willey und A. Rieves, „The measurement of airflow using Singing helmet that allows free movement of the jaw,“ *Journal of Voice*, Bd. 30, Nr. 6, pp. 641-648, 2016.
- [20] R. Dumond, S. Gastinger, H. Rahman, A. Le Faucheur, P. Quinton, H. Kang und J. Prioux, „Estimation of respiratory volume from thoracoabdominal breathing distances: comparison of two models of machine learning,“ *European Journal of Applied Physiology*, Bd. 117, pp. 1533-1555, 2017.
- [21] B. Binazzi, B. Lanini, R. Bianchi, I. Romagnoli, M. Nerini, F. Gigliotti, R. M.-E. J. Duranti und G. Scano, „Breathing Pattern and kinematics in normal subjects during speech, singing and loud whispering,“ *Acta Physiologica*, Bd. 186, pp. 233-246, 2006.
- [22] Spektrum Akademischer Verlag, Heidelberg, „Lexikon der Biologie,“ [spektrum.de](http://spektrum.de), 1999. [Online]. Available: [https://www.spektrum.de/lexika/showpopup.php?lexikon\\_id=9&art\\_id=5744&nummer=1988](https://www.spektrum.de/lexika/showpopup.php?lexikon_id=9&art_id=5744&nummer=1988). [Zugriff am 05 Oktober 2020].
- [23] B. Stephens, „HVAC Filtration and the Wells-Riley approach to assessing risks of infectious airborne diseases,“ 2013.
- [24] S.-C. Chen, C.-M. Liao, S.-S. Li und S.-H. You, „A Probabilistic Transmission Model to Assess Infection Risk from Mycobacterium Tuberculosis in Commercial Passenger Trains,“ *Risk Analysis*, Bd. 31, Nr. 6, pp. 930-939, 2011.
- [25] G. Chowell, H. Nishiura und L. M. A. Bettencourt, „Comparative estimation of the reproduction number of pandemic influenza from daily case notification data,“ *Journal of the Royal Society Interface*, Bd. 4, pp. 155-166, 2006.
- [26] B. J. Coburn und S. Blower, „Predicting the potential for within-flight transmission and global dissemination of MERS,“ *The Lancet*, Nr. 14, 2014.
- [27] WHO, „WHO MERS Global Summary and Assessment of Risk,“ WHO, 2019.
- [28] WHO, „Consensus document on the epidemiology of severe acute respiratory syndrome (SARS),“ WHO, 2003.
- [29] G. Buonanno, L. Stabile und L. Morawska, „Estimation of airborne viral transmission: Quanta emission rate of SARS-CoV-2 for infection risk assessment,“ *Environment International*, Bd. 141, 2020.
- [30] X. He, E. H. Y. Lau, P. Wu, X. Deng, J. Wang, X. Hao, Y. C. Lau, J. Y. Wong, Y. Guan, X. Tan, X. C. Y. Mo, B. Lio, W. Chen, F. Hu, Q. Zhang, M. Zhong, Y. Wu, L. Zhao, F. Zhang, C. B. J., F. Li und G. M. Leung, „Author Correction: Temporal Dynamics in viral shedding and transmissibility of COVID-19,“ *Nature Medicine*, 2020.
- [31] N. A. o. Sciences, *The Airliner Cabin Environment and the Health of Passengers and Crew*, United States of America: National Academy Press, 2002.
- [32] T. Günther, M. Czech-Sioli, D. Indenbirken, A. Robitailles, P. Tenhaken, M. Exner, M. Ottinger, N. Fischer, A. Grundhoff und M. M. Brinkmann, „Investigation of a superspreading event preceding the largest meat processing plant-related SARS-Coronavirus 2 outbreak in Germany,“ *Preprint*, 2020.
- [33] Y. Shen, C. Li, H. Dong, Z. Wang, L. Martinez, Z. Sun, A. Handel, Z. Chen, E. Chen, M. Ebel, F. Wang, B. Yi, H. Wang, X. Wang, A. Wang, B. Chen, Y. Qi, L. Liang, Y. Li, F. Ling, J. Chen und G. Xu, „Community Outbreak Investigation of SARS-CoV-2 Transmission Among Bus Riders in Eastern China,“ *JAMA International Medicine*, 2020.



- [34] S. Park, Y.-M. Kim, S. Lee, B.-J. Na, C. Kim, J.-i. Kim, H. Kim, Y. Kim, Y. Park, I. Huh, H. Kim, H. Yoon, H. Jang, K. Kim, Y. Chang, I. Kim, H. Lee, J. Gwack, S. Kim, M. Lim, S. Kweon, Y. Choe, O. Park und E. Jeong, „Coronavirus Disease Outbreak in Call Center, South Korea,“ *Emerging Infectious Diseases*, Bd. 26, Nr. 8, pp. 1666-1670, 2020.
- [35] C. Stein-Zamir, N. Abramson, H. Shoob, E. Libal, M. Bitan, T. Cardash, R. Cayam und I. Miskin, „A large COVID-19 outbreak in a high school 10 days after schools' reopening, Israel, May 2020,“ *Eurosurveillance*, 2020.
- [36] J. Lu, J. Gu, K. Li, C. Xu, W. Su, Z. Lai, D. Zhou, C. Yu, B. Xu und Z. Yang, „COVID-19 Outbreak Associated with Air Conditioning in Restaurant, Guangzhou, China,“ *Emerging Infectious Diseases*, Bd. 26, Nr. 7, pp. 1628-1631, 2020.
- [37] N. C. Khanh, P. Q. Thai, H.-L. Quach, N.-A. H. Thi, P. C. Dinh, T. N. Duong, L. T. Q. Mai, N. D. Nghia, T. T. A., L. N. Quang, T. D. Quang, T.-T. Nguyen, F. Vogt und D. D. Anh, „Transmission of Severe Acute Respiratory Syndrome Coronavirus 2 During Ling Flight,“ *Emerging Infectious Diseases*, Bd. 26, Nr. 11, 2020.
- [38] G. Buonanno, L. Morawska und L. Stabile, „Quantitative Assessment of the Risk of Airborne Transmission of SARS-COV-2-Infection: Prospective and Retrospective Applications,“ *Preprint MedXRiv*, 2020.
